# Supplementary material
Source: PubMed Central journal article supplement (PMC5451250)
Supplement: jci-127-90077-s001.pdf [file jci-127-90077-s001.pdf]

Supplemental figures

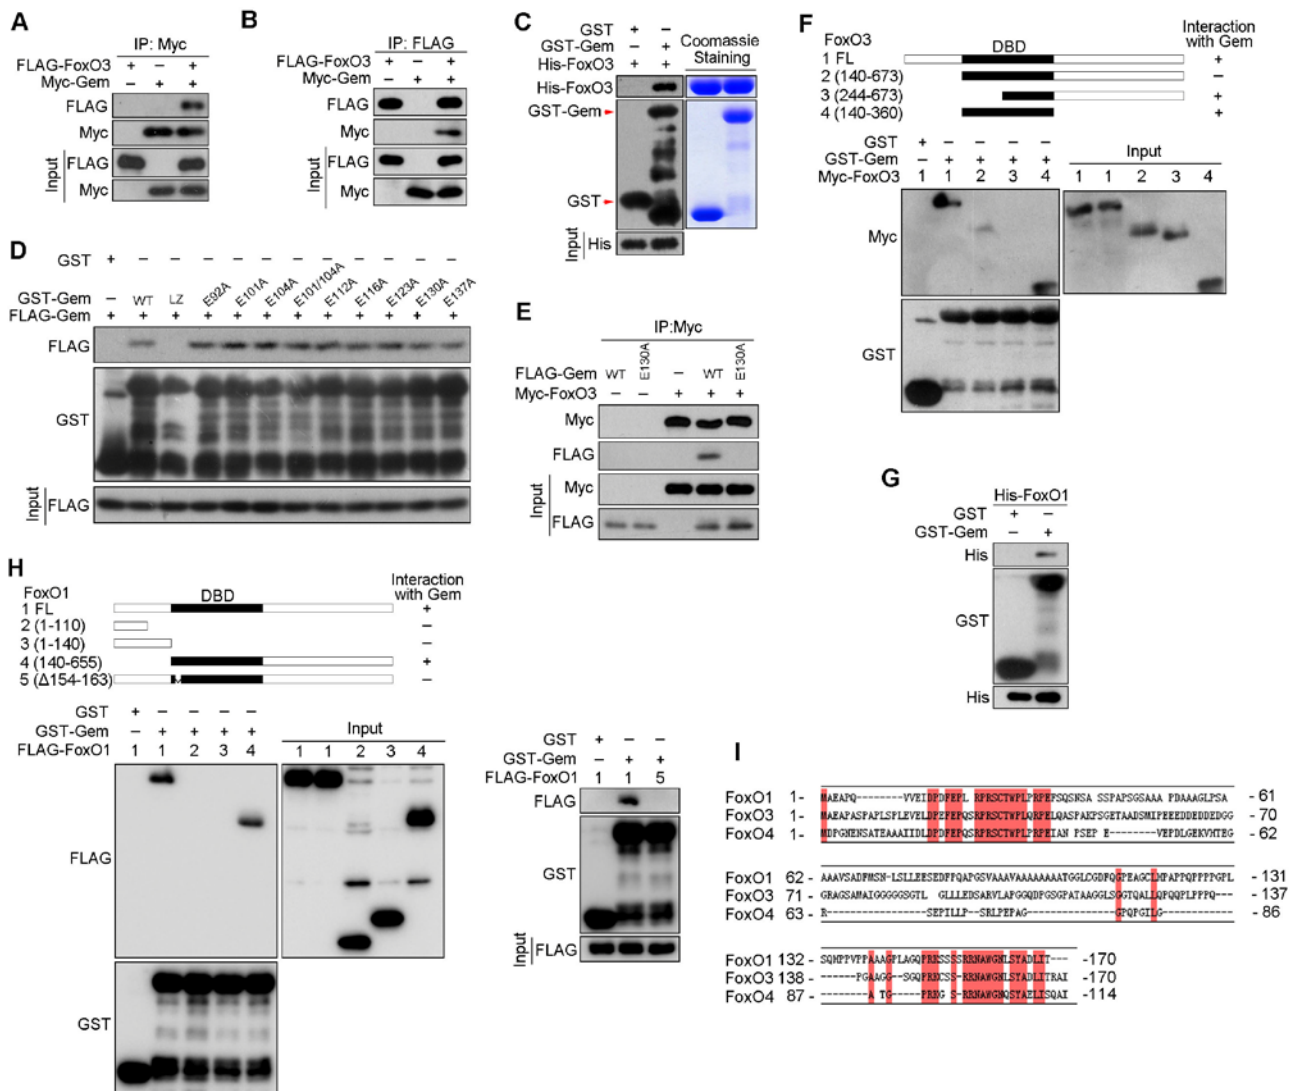

Supplemental Figure 1. Geminin interacts with FoxO3

(A and B) Cell lysates from HEK-293T cells transfected with the indicated constructs were subjected to immunoprecipitation with anti-Myc (A) or anti-FLAG (B). The immunoprecipitates were then blotted with the indicated antibodies. (C) Purified His-FoxO3 was incubated with GST or GST-Geminin coupled to GSH-Sepharose. Proteins retained on sepharose were then blotted with anti-GST and anti-His antibodies. (D) Cell lysates from HEK-293T cells transfected with FLAG-Geminin were incubated with the indicated GST recombinant proteins. Proteins retained on sepharose were then blotted with anti-FLAG and anti-GST antibodies. (E) Cell lysates from HEK-293T cells transfected with the indicated constructs were subjected to immunoprecipitation with anti-Myc antibody. The immunoprecipitates were then blotted with the indicated antibodies. (F) HEK-293T cells transfected with the indicated Myc-FoxO3 constructs were lysed and lysates were incubated with GST or GST-Geminin coupled to GSH-Sepharose. Proteins retained on sepharose were then blotted with the indicated antibodies. (G) Purified His-FoxO1 was incubated with GST or GST-Geminin coupled to GSH-Sepharose. Proteins retained on sepharose were then blotted with the indicated antibodies. (H) HEK-293T cells transfected with the indicated FLAG-FoxO1 constructs were lysed and lysates were incubated with GST or GST-Geminin coupled to GSH-Sepharose. Proteins retained on sepharose were then blotted with the indicated antibodies. (I) Sequence alignment of the N-terminal and partial DNA-binding domain from FoxO1, FoxO3 and FoxO4 are shown with reference to the residue numbers. Residues that are identical among family members are shaded in red.

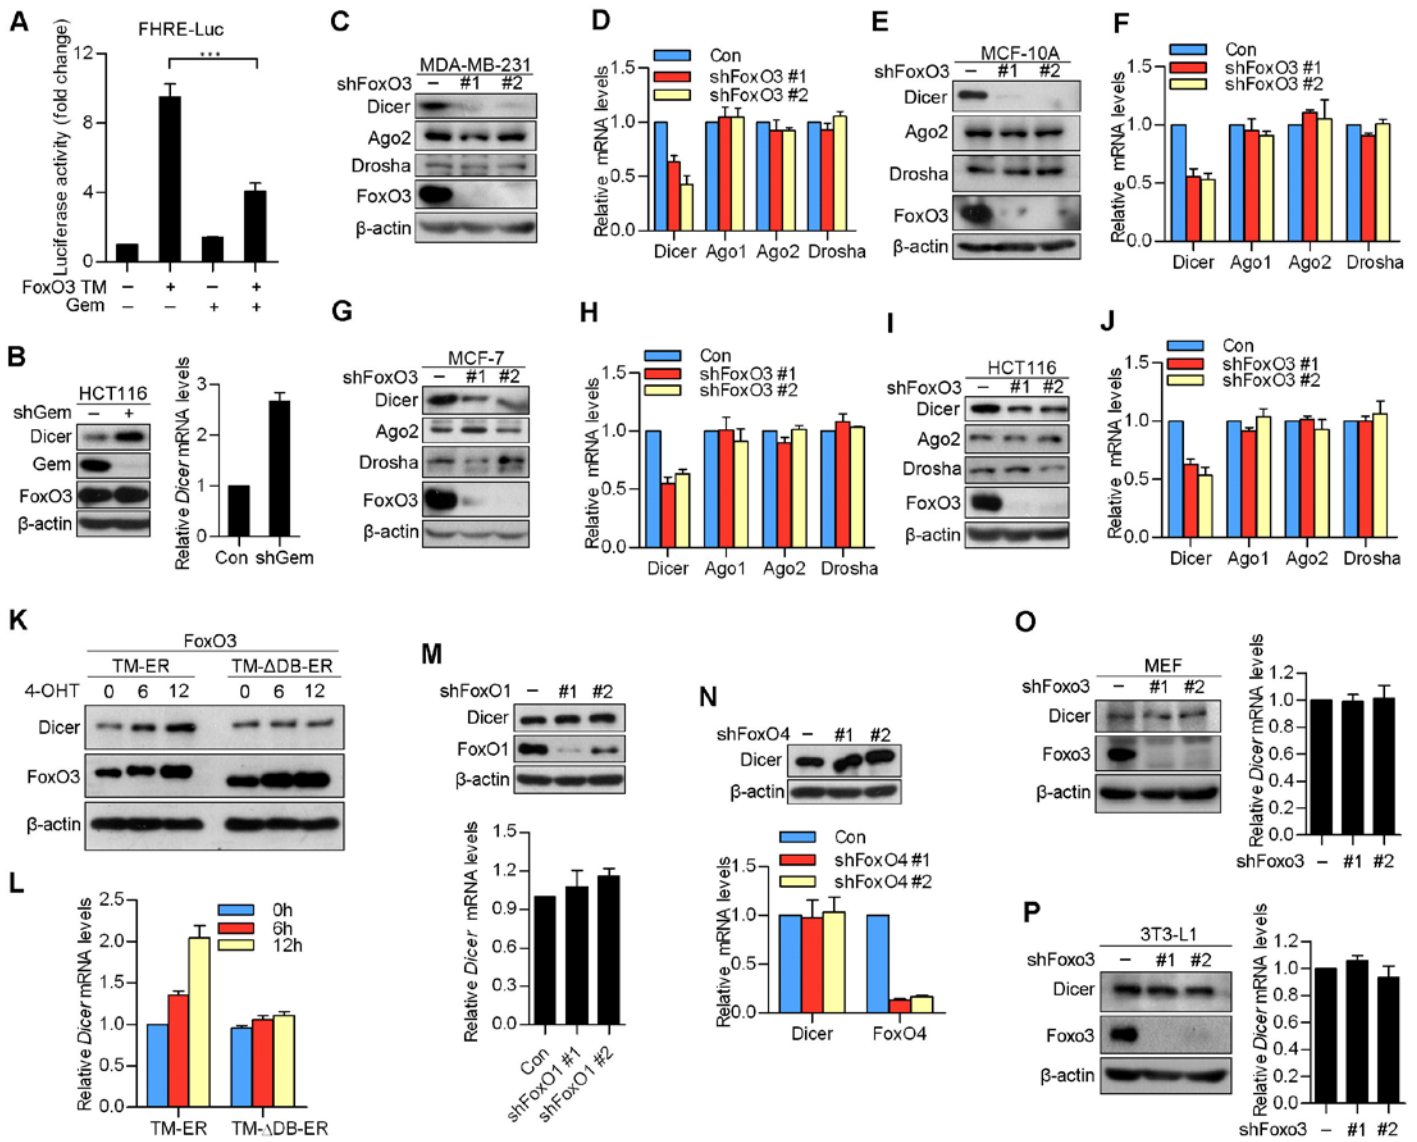

## Supplemental Figure 2. FoxO3 regulates Dicer expression

(A) Luciferase assay of HEK-293T cells co-transfected with the FHRE luciferase reporter and FoxO3-TM and/or Geminin. Luciferase reporter activity results are depicted as bar graph with mean±s.d. n=3 independent experiments. \*\*\*,  $P < 0.001$ , Student's *t*-test. (B) HCT116 cells infected with Geminin shRNA lentivirus were harvested and subjected to Western blotting analysis with the indicated antibodies (left panel). qRT-PCR analysis of Dicer mRNA level (right panel). For right panel, results are shown as mean±s.d. n=3 independent experiments. (C-J) MDA-MB231 (C and D), MCF-10A (E and F), MCF-7 (G and H) and HCT116 (I and J) cells were infected with lentivirus encoding FoxO3 shRNAs. Cell lysates and RNA were extracted and subjected to Western blotting (C, E, G and I) or qRT-PCR (D, F, H and J) analysis. Bar graphs (D, F, H and J) are shown as mean±s.d. n=3 independent experiments. (K and L) HCT116 cells expressing HA-FoxO3-TMER or TM-ΔDBER were exposed to 4-OHT (1 μM) for the indicated times. Protein lysates and RNA were extracted and subjected to Western blotting (K) or qRT-PCR (L). Bar graphs (L) are shown as mean±s.d. n=3 independent experiments. (M and N) MDA-MB-231 cells were infected with lentivirus encoding FoxO1 (M) or FoxO4 (N) shRNAs. Cell lysates and RNA were extracted and subjected to Western blotting (upper panel) or qRT-PCR (lower panel). For lower panel, results are shown as mean±s.d. n=3 independent experiments. (O and P) MEF (O) and 3T3-L1 (P) cells were infected with lentivirus encoding Control or Foxo3 shRNAs. Cell lysates and RNA were extracted and subjected to Western blotting (left panel) or qRT-PCR (right panel) analysis. Bar graphs (right panel) are shown as mean±s.d. n=3 independent experiments.

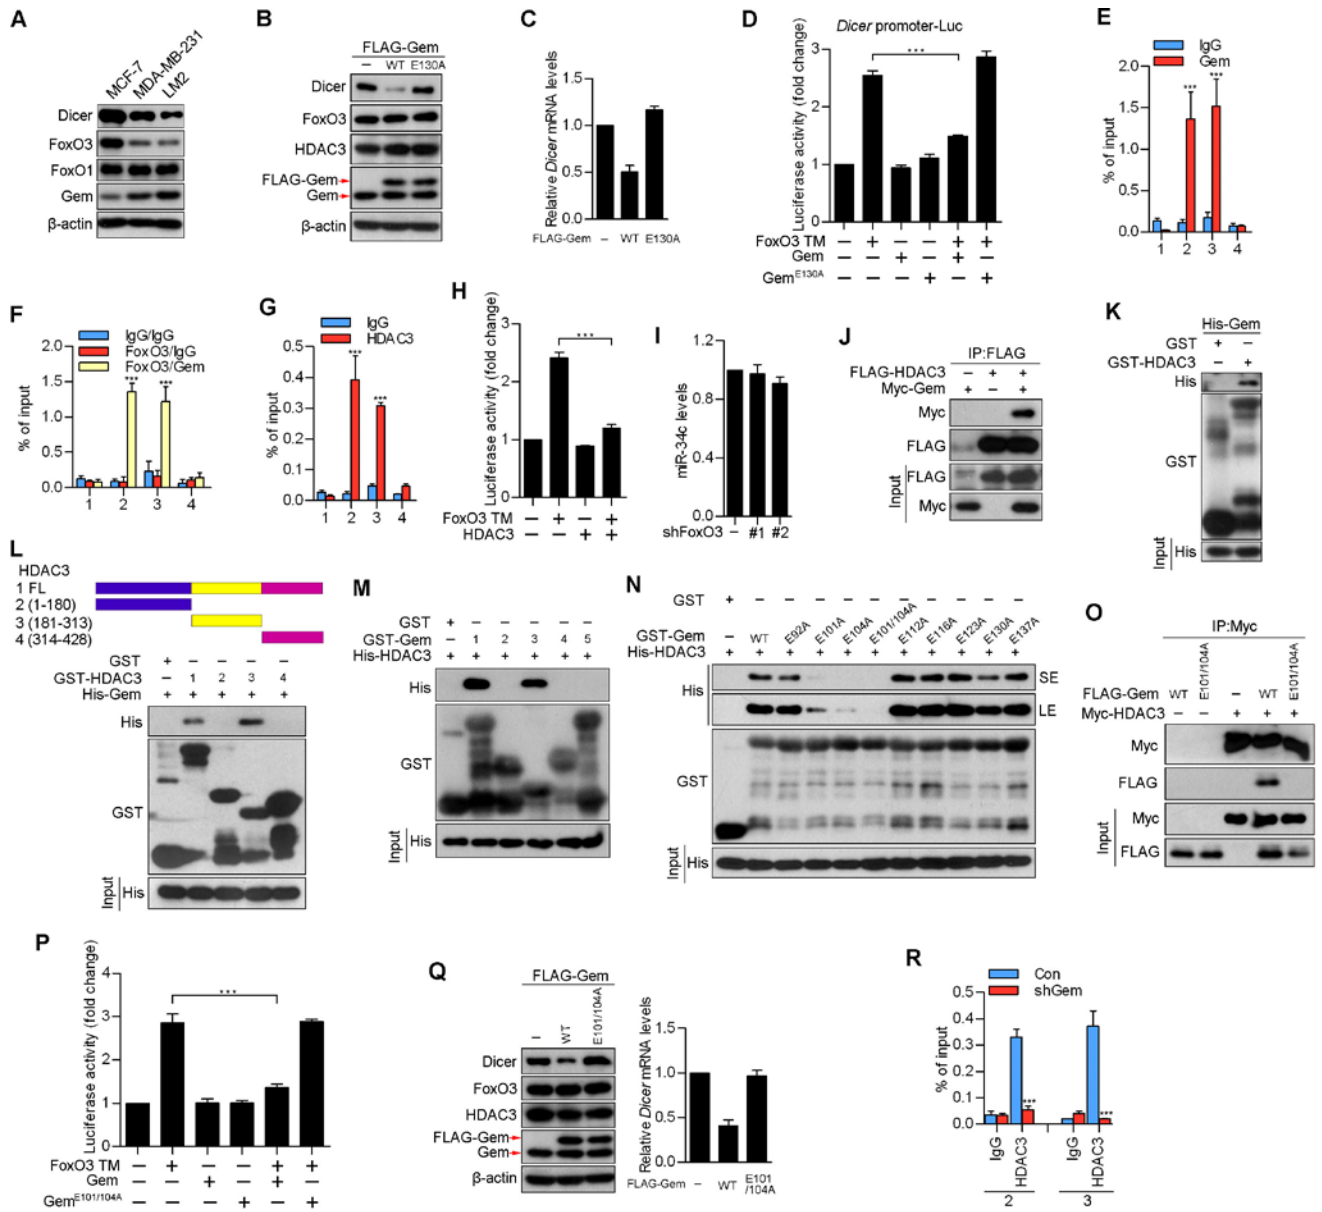

### Supplemental Figure 3. Geminin suppresses Dicer expression via coupling HDAC3 to FoxO3

(A) Protein lysates from MCF-7, MDA-MB-231 and LM2 cells were extracted and subjected to Western blotting. (B and C) LM2 cells were infected with indicated lentivirus. Protein lysates and RNA were extracted and subjected to Western blotting (B) or qRT-PCR (C). Bar graphs (C) are shown as mean±s.d. n=3 independent experiments. (D) Luciferase assay of HEK-293T cells co-transfected with the *Dicer* promoter luciferase reporter and the indicated constructs. Luciferase reporter activity results are depicted as bar graph with mean±s.d. n=3 independent experiments. \*\*\*,  $P<0.001$ , Student's *t*-test. (E) ChIP assay to analyze the occupancy of Geminin on *Dicer* promoter. Results are shown as mean±s.d. n=3 independent experiments. \*\*\*,  $P<0.001$ , Student's *t*-test. (F) ChIP-reChIP was conducted in LM2 cells. Results are shown as mean±s.d. n=3 independent experiments. \*\*\*,  $P<0.001$ , Student's *t*-test. (G) ChIP assay to analyze the occupancy of HDAC3 on *Dicer* promoter. Results are shown as mean±s.d. n=3 independent experiments. \*\*\*,  $P<0.001$ , Student's *t*-test. (H) Luciferase assay of HEK-293T cells co-transfected with the *Dicer* promoter luciferase reporter and the indicated plasmids. Luciferase reporter activity results are depicted as bar graph with mean±s.d. n=3 independent experiments. \*\*\*,  $P<0.001$ , Student's *t*-test. (I) LM2 cells were infected with lentivirus encoding FoxO3 shRNAs. RNA was extracted and subjected to qRT-PCR. Results are shown as mean±s.d. n=3 independent experiments. (J) Cell lysates from HEK-293T cells transfected with the indicated constructs were subjected to immunoprecipitation with anti-FLAG antibody. The immunoprecipitates were then blotted with anti-Myc and anti-FLAG antibodies. (K) Purified His-Geminin was incubated with GST or GST-HDAC3 coupled to GSH-Sepharose. Proteins retained on sepharose were then blotted with the indicated antibodies. (L-N) Purified His-Geminin (L) or His-HDAC3 (M and N) was incubated with the indicated GST recombinant proteins. Proteins retained on sepharose were then blotted with the indicated antibodies. (O) Cell lysates from HEK-293T cells transfected with the indicated constructs were subjected to immunoprecipitation with anti-Myc antibody. The immunoprecipitates were then blotted with the indicated antibodies. (P) Luciferase assay of HEK-293T cells co-transfected with the *Dicer* promoter luciferase reporter and the indicated plasmids. Luciferase reporter activity results are depicted as bar graph with mean±s.d. n=3 independent experiments. \*\*\*,  $P<0.001$ , Student's *t*-test. (Q) LM2 cells were infected with the indicated lentiviral constructs. Protein lysates and RNA were extracted and subjected to Western blotting (left panel) or qRT-PCR (right panel) analysis. Bar graphs (right panel) are shown as mean±s.d. n=3 independent experiments. (R) ChIP assay to analyze the occupancy of HDAC3 on *Dicer* promoter in LM2 cells with control versus Geminin depletion. n=3 independent experiments. \*\*,  $P<0.01$ , Student's *t*-test.

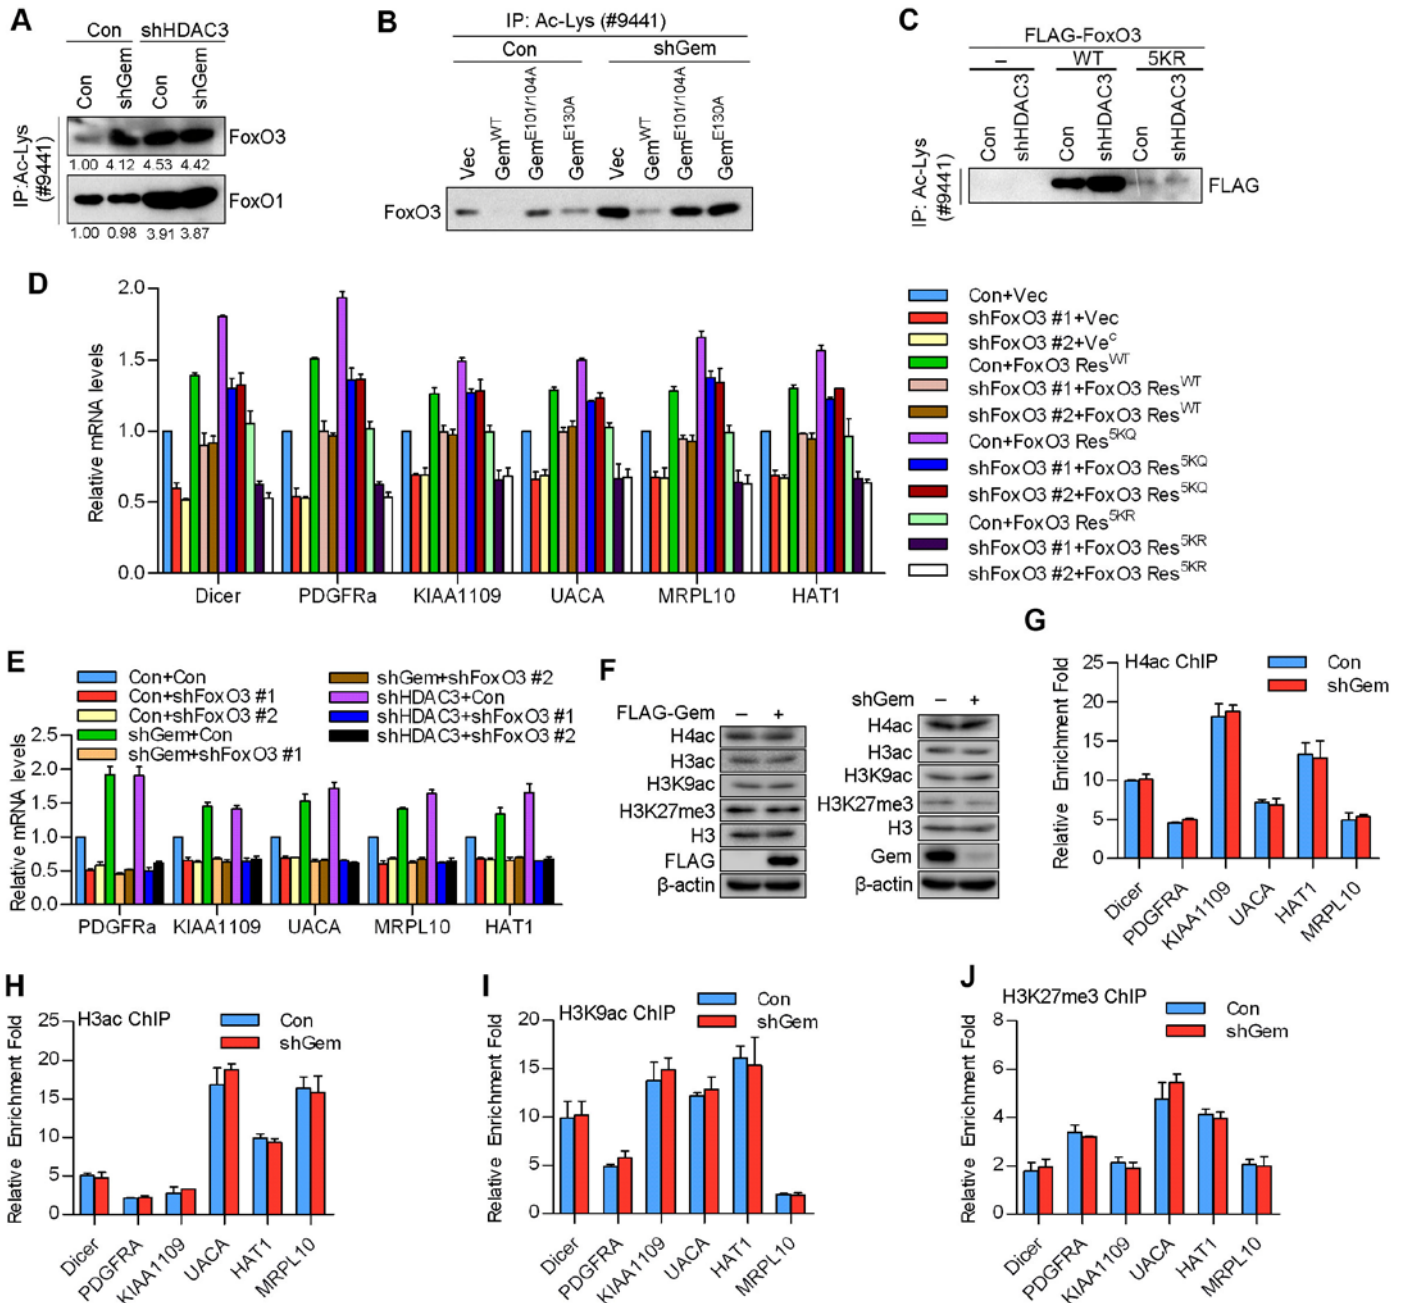

#### Supplemental Figure 4. Geminin inhibits FoxO3 via recruiting HDAC3 to deacetylate FoxO3

(A) LM2 cells infected with the indicated lentivirus were lysed and subjected to immunoprecipitation with anti-Ac-Lys antibody. The immunoprecipitates were then blotted with the indicated antibodies. (B) Geminin-depleted LM2 cells were reconstituted with the indicated Geminin constructs. Cell lysates were then subjected to immunoprecipitation with anti-Ac-Lys antibody. The immunoprecipitates were blotted with anti-FoxO3 antibody. (C) FoxO3-depleted LM2 cells were first reconstituted with the indicated FoxO3 constructs and then infected with lentivirus encoding the indicated shRNAs. Cells were lysed and lysates were subjected to immunoprecipitation with anti-Ac-Lys antibody. The immunoprecipitates were then blotted with anti-FLAG antibody. (D and E) LM2 cells were infected with lentivirus encoding the indicated shRNAs. RNA was extracted and subjected to qRT-PCR analysis of the indicated mRNA levels. Results are shown as mean $\pm$ s.d. n=3 independent experiments. (F) LM2 cells were infected with lentivirus encoding the indicated shRNAs. Cell lysates were extracted and subjected to Western blotting. (G-J) ChIP analysis of the indicated histone modifications at the indicated FoxO3 target promoters in Geminin-depleted LM2 cells. Results are shown as mean $\pm$ s.d. n=3 independent experiments.

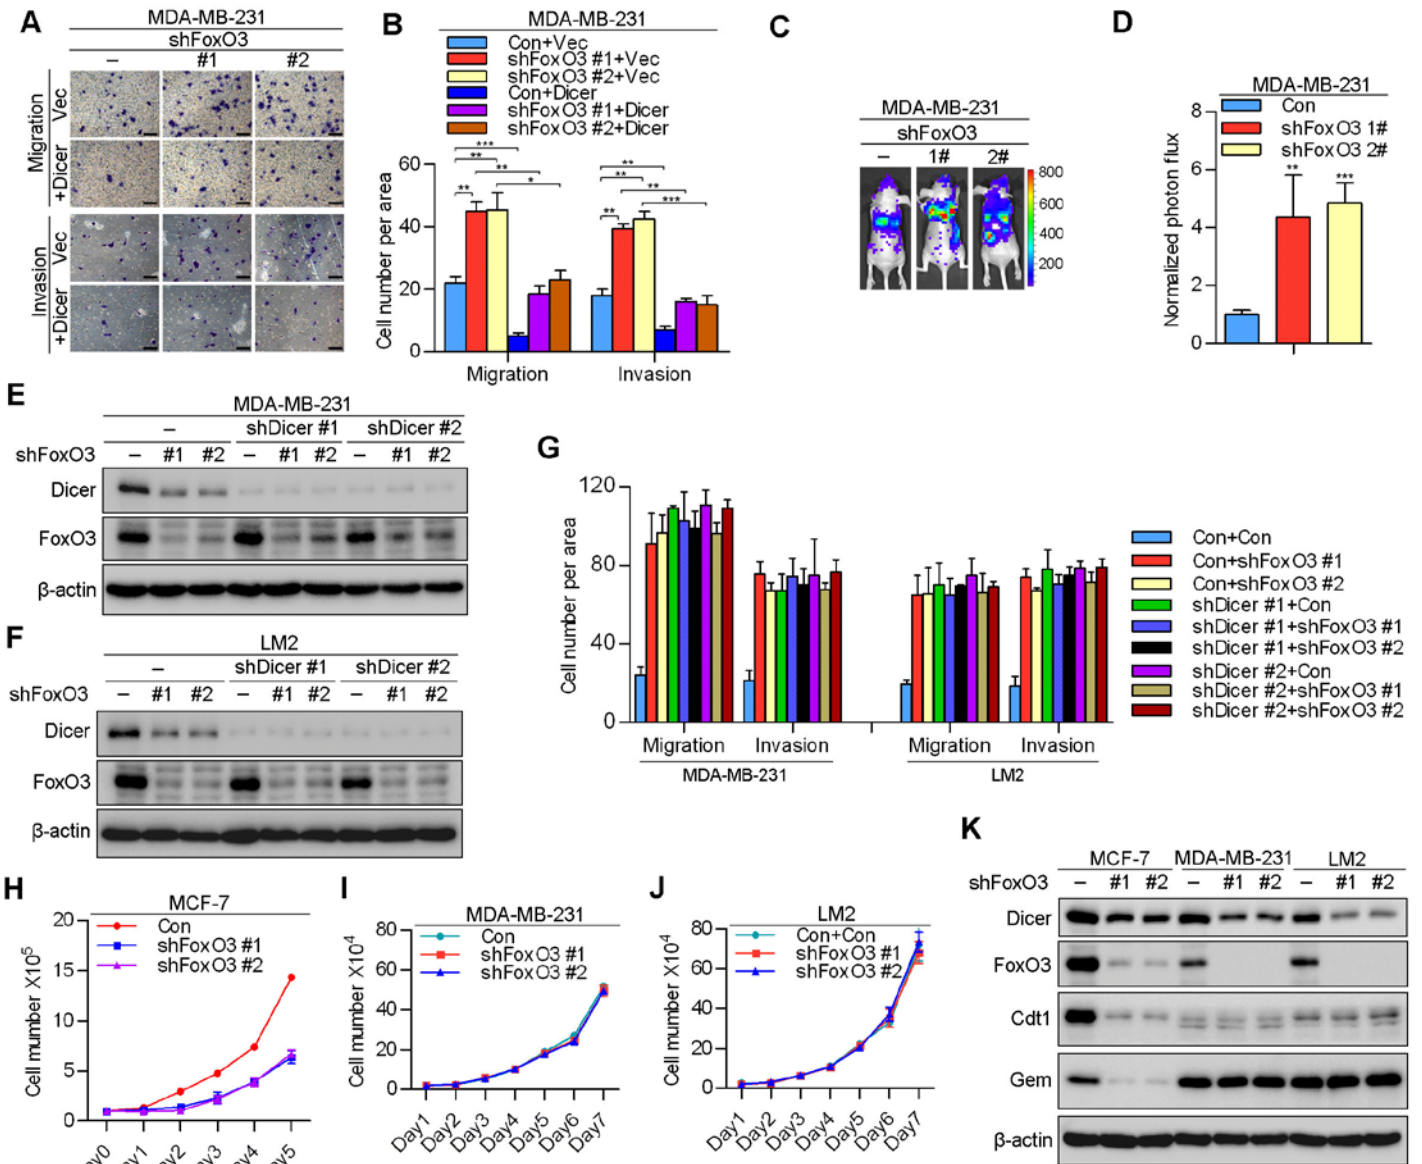

### Supplemental Figure 5. FoxO3 regulates metastasis through Dicer

(A and B) MDA-MB-231 cells infected with the indicated lentivirus were subjected to migration and invasion assay. Bar graphs (B) are shown as mean $\pm$ s.d. n=3 independent experiments. Scale bar, 50 $\mu$ m. \*\*\* $P < 0.001$ , \*\* $P < 0.01$ , \* $P < 0.05$  by ANOVA Bonferroni post hoc test. (C and D) Luciferase-labeled MDA-MB-231 cells infected with lentivirus encoding FoxO3 shRNA were injected into fat pad of nude mice. Representative BLI images of mice with spontaneous metastasis (C) and quantification of the bioluminescence signal (D) were shown. Bar graphs (D) are shown as mean $\pm$ s.d. n=8 mice/group. \*\*\* $P < 0.001$ , \*\* $P < 0.01$  by Student's *t* test. (E and F) MDA-MB-231 (E) or LM2 (F) cells were infected with lentivirus encoding FoxO3 and/or Dicer shRNAs. Cell lysates were extracted and subjected to Western blotting. (G) Cells from (E) and (F) were subjected to transwell migration and invasion assays. Results were shown as mean $\pm$ s.d. n=3 independent experiments. (H-J) MCF-7 (H), MDA-MB-231 (I) and LM2 (J) Cells infected with lentivirus encoding FoxO3 shRNAs were subjected to cell proliferation assay. Results are shown as mean $\pm$ s.d. n=3 independent experiments. (K) MCF-7, MDA-MB-231 and LM2 Cells infected with lentivirus encoding FoxO3 shRNAs were subjected to Western blotting analysis with the indicated antibodies.

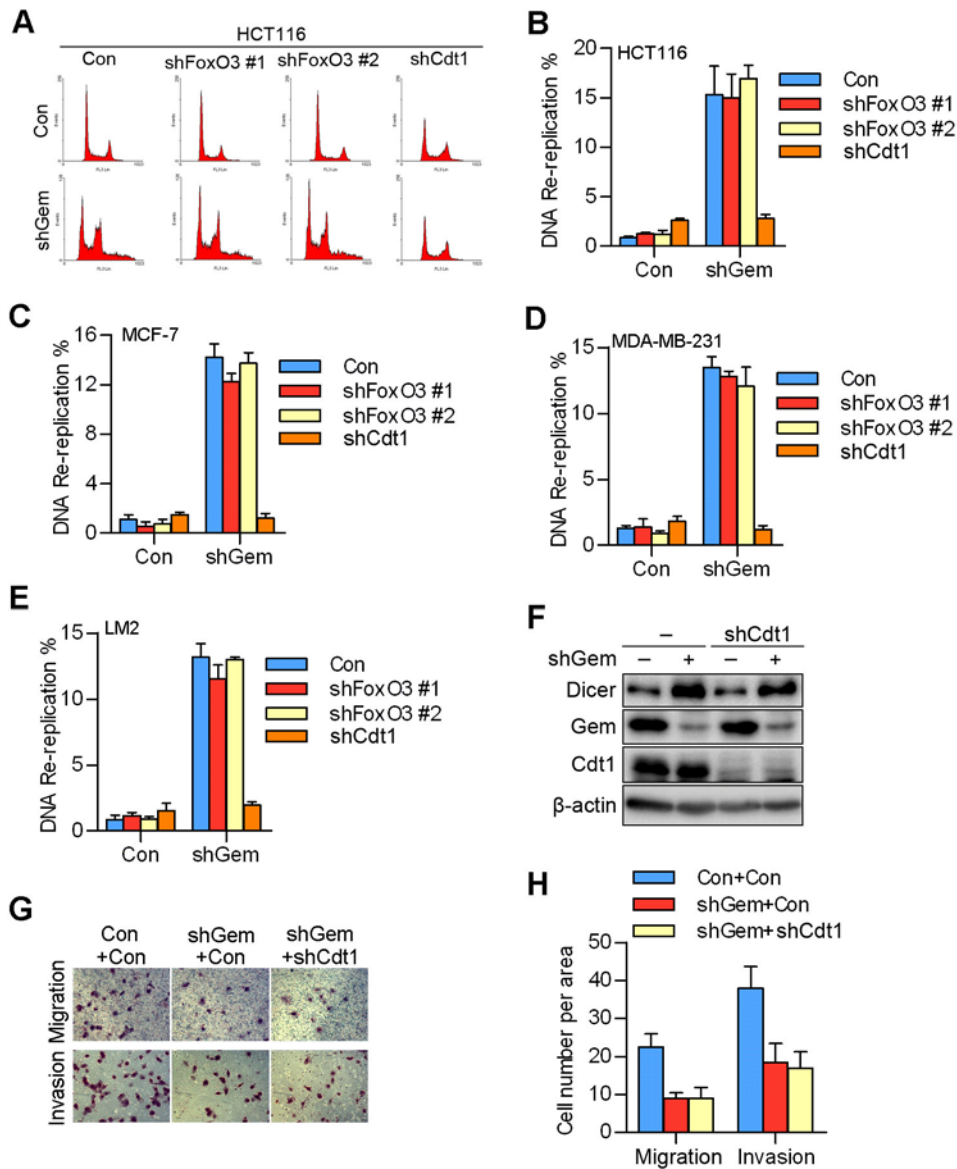

**Supplemental Figure 6. Geminin's dual roles in DNA-replication and in metastasis are separate from each other.**

(A-E) Flow cytometric profiles of HCT116 (A and B), MCF-7 (C), MDA-MB-231 (D) and LM2 (E) cells infected with indicated shRNAs. Results are depicted as bar graph with mean $\pm$ s.d. n=3 independent experiments. (F) LM2 cells were infected with lentivirus encoding Gem and/or Cdt1 shRNAs. Cell lysates were extracted and subjected to Western blotting. (G and H) Cells from (F) were subjected to transwell migration and invasion assays. Results were shown as mean $\pm$ s.d. n=3 independent experiments.

96  
97  
98  
99  
100  
101  
102  
103  
104  
105  
106  
107  
108  
109  
110  
111  
112  
113  
114  
115

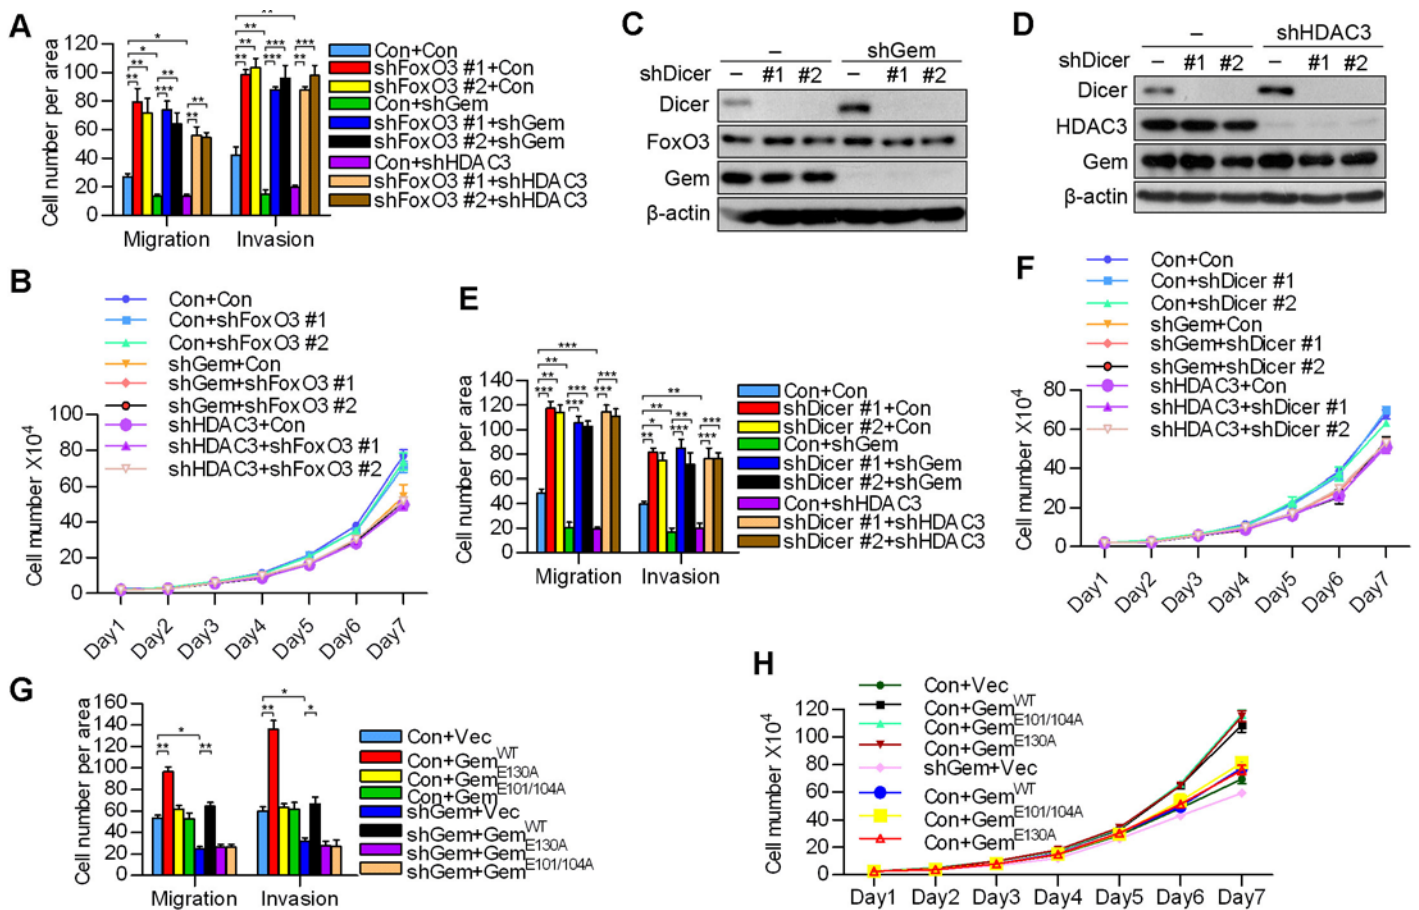

**Supplemental Figure 7. Geminin/HDAC3 complex regulates metastasis through FoxO3-Dicer axis**

(A and B) LM2 cells infected with lentivirus encoding FoxO3 shRNA and/or Geminin or HDAC3 shRNA were subjected to migration/invasion (A) and proliferation assay (B). Bar graphs are shown as mean $\pm$ s.d. n=3 independent experiments. \*\*\* $P$ <0.001, \*\* $P$ <0.01, \* $P$ <0.05 by ANOVA Bonferroni post hoc test. (C and D) LM2 cells were infected with lentivirus encoding the indicated shRNAs. Proteins were extracted and subjected to Western blotting analysis with the indicated antibodies. (E and F) LM2 cells infected with lentivirus encoding Dicer shRNAs and/or shRNAs targeting Geminin or HDAC3 were subjected to migration/invasion (E) and proliferation assay (F). Bar graphs are shown as mean $\pm$ s.d. n=3 independent experiments. \*\*\* $P$ <0.001, \*\* $P$ <0.01, \* $P$ <0.05 by ANOVA Bonferroni post hoc test. (G and H) LM2 cells infected with lentivirus encoding Geminin shRNAs and/or Geminin expression constructs were subjected to migration/invasion (G) and proliferation assay (H). Bar graphs are shown as mean $\pm$ s.d. n=3 independent experiments. \*\* $P$ <0.01, \* $P$ <0.05 by ANOVA Bonferroni post hoc test.

**A**

|                     | Case | Gem staining% | P value | Dicer staining% | P value |
|---------------------|------|---------------|---------|-----------------|---------|
| ER positive         | 64   | 35.95±3.489   | NS      | 29.41±3.645     | NS      |
| ER negative         | 119  | 35.36±2.394   |         | 28.82±2.053     |         |
| Her2 positive       | 84   | 35.98±3.153   | NS      | 28.23±3.106     | NS      |
| Her2 negative       | 99   | 35.37±2.493   |         | 27.34±2.194     |         |
| Triple negative     | 91   | 34.97±2.624   | NS      | 29.65±2.175     | NS      |
| Non-triple negative | 92   | 36.16±2.956   |         | 28.21±3.106     |         |
| Grade I/II          | 109  | 33.88±2.216   | 0.0114  | 31.66±2.439     | 0.0235  |
| Grade III           | 74   | 43.76±3.372   |         | 23.27±2.636     |         |

**B**

|                     | Case | FoxO3 staining% | P value | HDAC3 staining% | P value |
|---------------------|------|-----------------|---------|-----------------|---------|
| ER positive         | 64   | 25.95±2.345     | NS      | 32.33±3.574     | NS      |
| ER negative         | 119  | 24.44±2.494     |         | 31.75±3.112     |         |
| Her2 positive       | 84   | 25.36±3.254     | NS      | 31.33±2.548     | NS      |
| Her2 negative       | 99   | 25.46±3.186     |         | 32.25±2.825     |         |
| Triple negative     | 91   | 25.875±3.587    | NS      | 31.75±2.475     | NS      |
| Non-triple negative | 92   | 25.16±3.256     |         | 31.57±2.306     |         |
| Grade I/II          | 109  | 28.568±2.356    | 0.0328  | 30.75±2.587     | 0.0075  |
| Grade III           | 74   | 21.36±2.268     |         | 43.84±2.636     |         |

**C**

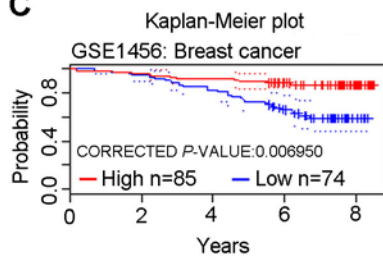

**D**

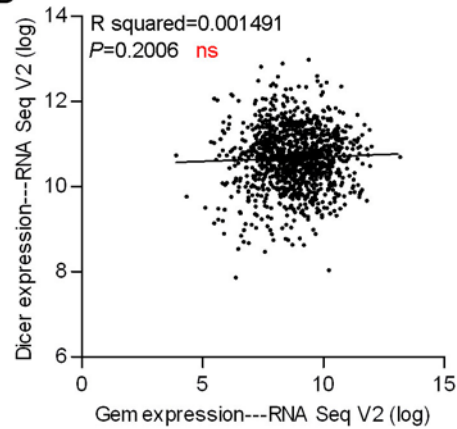

**Supplemental Figure 8. Negative correlation between Geminin/HDAC3 and acetyl-FoxO3-Dicer in clinical breast cancer samples**

(A and B) Summary and statistical analysis of Immunohistochemical staining data in Figure 7A. (C) Kaplan-Meier analysis of overall survival in breast cancer patients with high versus low *Dicer* expression. The data were obtained from Prognoscan and the GSE number is shown in the panel. (D) Correlation analysis between Geminin and Dicer expression using breast cancer samples from TCGA database.

144  
145  
146  
147  
148  
149  
150  
151  
152  
153  
154  
155  
156  
157  
158  
159  
160  
161  
162



## Supplemental methods

### Western Blotting

Cultured cells were lysed with RIPA lysis buffer (50mM Tris-HCl, 150mM NaCl, 1% Triton X-100, 1% Sodium deoxycholate, 0.1% SDS). Protein concentration of each sample was determined using the BCA kit (Pierce, 23235) as manufacturer's instructions. Equal amounts of protein extracts were separated by electrophoresis on appropriate Tris-Glycine gel, and then transferred to a nitrocellulose membrane (Roche, 03010040001). The membrane was probed with different primary antibodies, followed by secondary antibodies conjugated to horseradish peroxidase. Quantitative densitometry analysis was performed with image analysis software (Quantity one, Bio-Rad).

### RNA Interference

Lentiviral based vector pLV-H1-EF1 $\alpha$  (Biosettia) was used for RNA interference experiment. shRNA sequences for target genes as follows:

Control: 5'-GCAAAGAAGGCCACTACTATA-3';

shFoxO3 #1: 5'-GCACAACCTGTCCTGTCATAG-3';

shFoxO3 #2: 5'-GCTCACTTCGGACTCACTTAG-3';

shGeminin: 5'-TGCCAACTCTGGAATCAAAA-3';

shHDAC3: 5'-GCTTCACCAAGAGTCTTAATG-3';

shDicer #1: 5'-GCAGCTCTGGATCATAATACC-3;

shDicer #2: 5'-GGAAGAATCAGCCTCGCAACA-3;

shCdt1: 5'- GCGCAATGTTGGCCAGATCAA-3'. Lentiviruses were generated according to the manufacturer's protocol. The viruses were used to infected cells in the presence of protamine sulfate (8 $\mu$ g/ml).

### Quantitative RT-PCR

Total RNA was isolated from samples with Trizol reagents following the manufacturer's instructions (Invitrogen). cDNA was prepared with the MMLV Reverse Transcriptase (Fermentas). Quantitative PCR was performed using the StepOne-Plus real-time PCR system (Applied Biosystems Inc., Foster City, CA) that measures real-time SYBR green fluorescence and then calculated by means of the comparative Ct method ( $2^{-\Delta\Delta C_t}$ ) with the expression of TBP as an internal control. The primer sequences used for the real-time PCR experiments are listed in Table S4.

### Plasmids and Antibodies.

196 FoxO3, Geminin, HDAC3 and Dicer were cloned into expression vectors and deletion mutants were generated  
197 by a PCR-based approach. All constructs were sequenced prior to use. The following antibodies were used:  
198 anti-FoxO3 (Cell Signaling, #2497), anti-FKHRL1 (Santa Cruz, #11351), anti-FoxO1 (Cell Signaling, #2880),  
199 anti-Geminin (Santa Cruz, #8448), anti-HDAC3 (Cell Signaling, #3949), anti-Dicer (Cell Signaling, #3363),  
200 anti-Acetyl Lysine (Cell Signaling, #9441), anti-Ac-FKHR (Santa Cruz, #49437), anti-FLAG (Sigma,  
201 F7425), anti-FLAG (Sigma, F3165), anti-FLAG (Abcam, ab1257), anti-Myc (Cell Signaling, #2276),  
202 anti-Myc (Cell Signaling, #2278), anti-c-Myc (Abcam, ab32072), anti-HA (Roche, #11867423001),  
203 anti- $\beta$ -actin (Sigma, A1978), anti-His (Santa Cruz, #803 ), anti-GST (Cell Signaling, #2622),  
204 anti-Ago2(Proteintech, 10686-1-AP), anti-Drosha(Proteintech, 55001-1-AP), anti-Histone H3(Cell Signaling,  
205 #4499), anti-acetyl-Histone H3(Millipore, #06-599), anti-acetyl-Histone H4(Millipore, #06-866), anti-Histone  
206 H3 (acetyl K9) (Abcam, ab10812), anti-Tri-Methyl-Histone H3 (Lys27) (Cell Signaling, #9733).

### 208 **Immunoprecipitation (IP) and Two-step co-immunoprecipitation.**

209 Cells were lysed in IP buffer containing 50mM Tris-HCl, 100mM NaCl, 40mM  $\beta$ -glycerol phosphate, 1mM  
210  $\text{Na}_4\text{VO}_3$ , 10mM NaF, supplemented with phosphatase inhibitor and protease inhibitor (Roche). Cell lysates  
211 were incubated with antibody overnight at 4°C. ProteinA/G beads were added and 2hr later washed 3 times  
212 with IP buffer and analyzed by SDS-PAGE and immunoblotting.

213 Two-step co-immunoprecipitation was performed essentially according to the procedures described  
214 previously (Harada et al., 2003). Briefly, LM2 cells were lysed with LSLD buffer, sonicated and centrifuged.  
215 The supernatant was subjected to immunoprecipitation by incubating with an anti-Geminin antibody overnight  
216 at 4°C. ProteinA/G beads were added and 2hr later the beads were washed with lysis buffer containing NaCl  
217 (150 mM) three times, and the Geminin-based protein complexes were eluted with lysis buffer (300  $\mu$ l)  
218 containing NaCl (250 mM) and Geminin antigen for 2 h at 4°C. The second immunoprecipitation was  
219 performed using elute (150  $\mu$ l) from the first immunoprecipitates and lysis buffer (350  $\mu$ l) containing NaCl  
220 (150 mM) and an HDAC3 antibody or a control IgG. The immunoprecipitates were then blotted with  
221 indicated antibodies.

228 **Supplemental references.**

229 Harada, J., Kokura, K., Kanei-Ishii, C., Nomura, T., Khan, M.M., Kim, Y., and Ishii, S. (2003). Requirement of the co-repressor  
230 homeodomain-interacting protein kinase 2 for ski-mediated inhibition of bone morphogenetic protein-induced transcriptional  
231 activation. *J Biol Chem* 278, 38998-39005.

232  
233  
234  
235  
236  
237  
238  
239  
240  
241  
242  
243  
244  
245  
246  
247  
248  
249  
250  
251  
252  
253  
254  
255  
256  
257  
258  
259  
260  
261

**Supplemental Table 1: RNA Sequencing Data**

| <b>Symbol</b> | <b>RawIntensi<br/>ty-<br/>control</b> | <b>RawIntensi<br/>ty-<br/>shFoxO3</b> | <b>TPM-cont<br/>rol</b> | <b>TPM-<br/>shFox<br/>O3</b> | <b>log2<br/>Ratio<br/>(f3/contr<br/>ol)</b> | <b>P-Valu<br/>e</b> | <b>FDR</b> | <b>transcriptI<br/>D</b> |
|---------------|---------------------------------------|---------------------------------------|-------------------------|------------------------------|---------------------------------------------|---------------------|------------|--------------------------|
| IFI27         | 7                                     | 245                                   | 2.08                    | 71.46                        | 5.10248                                     | 8.76E-06            | 9.26E-05   | NM_001130080             |
| IFIT1         | 18                                    | 515                                   | 5.34                    | 150.22                       | 4.814093                                    | 9.80E-09            | 1.76E-07   | NM_001548                |
| IFIT3         | 2                                     | 47                                    | 0.59                    | 13.71                        | 4.53837                                     | 0.00014             | 0.00091    | NM_001031683             |
| OASL          | 6                                     | 108                                   | 1.78                    | 31.5                         | 4.145403                                    | 1.54E-05            | 0.000154   | NM_198213                |
| PSMB9         | 17                                    | 59                                    | 5.04                    | 17.21                        | 1.771751                                    | 1.29E-06            | 1.63E-05   | NM_002800                |
| C19orf66      | 26                                    | 87                                    | 7.71                    | 25.38                        | 1.718889                                    | 7.72E-09            | 1.40E-07   | NM_018381                |
| RARA          | 18                                    | 60                                    | 5.34                    | 17.5                         | 1.712443                                    | 1.82E-06            | 2.24E-05   | NM_001145302             |
| FBXW7         | 13                                    | 43                                    | 3.85                    | 12.54                        | 1.703607                                    | 6.13E-05            | 0.000524   | NM_033632                |
| TNFAIP1       | 20                                    | 66                                    | 5.93                    | 19.25                        | 1.698754                                    | 6.39E-07            | 8.56E-06   | NM_021137                |
| FSTL3         | 24                                    | 79                                    | 7.12                    | 23.04                        | 1.694192                                    | 5.14E-08            | 8.40E-07   | NM_005860                |
| TAP1          | 38                                    | 124                                   | 11.27                   | 36.17                        | 1.682306                                    | 1.03E-11            | 2.73E-10   | NM_000593                |
| CST3          | 305                                   | 982                                   | 90.44                   | 286.44                       | 1.6632                                      | 7.83E-13            | 2.74E-11   | NM_000099                |
| CFDP1         | 14                                    | 45                                    | 4.15                    | 13.13                        | 1.661684                                    | 5.53E-05            | 0.000477   | NM_006324                |
| ABLIM3        | 17                                    | 54                                    | 5.04                    | 15.75                        | 1.643856                                    | 1.12E-05            | 0.00016    | NM_014945                |
| ICA1L         | 14                                    | 44                                    | 4.15                    | 12.83                        | 1.628338                                    | 8.48E-05            | 0.000703   | NM_138468                |
| LOC400027     | 15                                    | 46                                    | 4.45                    | 13.42                        | 1.592507                                    | 7.56E-05            | 0.000633   | NR_028408                |
| VGF           | 23                                    | 70                                    | 6.82                    | 20.42                        | 1.582139                                    | 1.08E-06            | 1.39E-05   | NM_003378                |
| UBASH3B       | 42                                    | 126                                   | 12.45                   | 36.75                        | 1.561599                                    | 8.04E-11            | 1.92E-09   | NM_032873                |
| DUOX1         | 15                                    | 45                                    | 4.45                    | 13.13                        | 1.56099                                     | 0.00015             | 0.000918   | NM_017434                |
| CILP2         | 37                                    | 110                                   | 10.97                   | 32.09                        | 1.54856                                     | 1.61E-09            | 3.24E-08   | NM_153221                |
| GLIPR2        | 54                                    | 159                                   | 16.01                   | 46.38                        | 1.53453                                     | 6.01E-13            | 2.16E-11   | NM_022343                |
| NGFR          | 17                                    | 50                                    | 5.04                    | 14.58                        | 1.532495                                    | 5.92E-05            | 0.0005     | NM_002507                |

|          |     |     |       |        |          |          |          |              |
|----------|-----|-----|-------|--------|----------|----------|----------|--------------|
|          |     |     |       |        |          | 05       | 07       |              |
| OAS3     | 26  | 76  | 7.71  | 22.17  | 1.523806 | 7.56E-07 | 9.97E-06 | NM_006187    |
| HOXB9    | 22  | 64  | 6.52  | 18.67  | 1.517778 | 6.22E-06 | 6.80E-05 | NM_024017    |
| LOXL2    | 56  | 163 | 16.61 | 47.54  | 1.51709  | 4.71E-13 | 1.74E-11 | NM_002318    |
| JAG1     | 40  | 116 | 11.86 | 33.84  | 1.512626 | 1.12E-09 | 2.31E-08 | NM_000214    |
| C8ORFK29 | 25  | 72  | 7.41  | 21     | 1.502844 | 1.91E-06 | 2.33E-05 | NR_015428    |
| PBX2     | 97  | 279 | 28.76 | 81.38  | 1.500611 | 1.16E-13 | 4.94E-12 | NM_002586    |
| WRB      | 24  | 69  | 7.12  | 20.13  | 1.499398 | 3.23E-06 | 3.76E-05 | NM_001146218 |
| STAT1    | 254 | 730 | 75.32 | 212.93 | 1.499274 | 4.89E-13 | 1.80E-11 | NM_007315    |
| RRM2B    | 169 | 460 | 50.11 | 134.18 | 1.420999 | 2.62E-14 | 1.27E-12 | NM_001172478 |
| NDRG1    | 88  | 239 | 26.09 | 69.71  | 1.417869 | 5.48E-14 | 2.52E-12 | NM_001135242 |
| SAMD4A   | 43  | 116 | 12.75 | 33.84  | 1.408232 | 7.73E-09 | 1.40E-07 | NM_001161576 |
| CRIM1    | 69  | 186 | 20.46 | 54.25  | 1.406817 | 2.32E-13 | 9.21E-12 | NM_016441    |
| PPM1A    | 62  | 167 | 18.38 | 48.71  | 1.406081 | 4.13E-12 | 1.18E-10 | NM_021003    |
| ARID3B   | 29  | 78  | 8.6   | 22.75  | 1.403458 | 2.42E-06 | 2.90E-05 | NM_006465    |
| C5orf28  | 32  | 86  | 9.49  | 25.09  | 1.402632 | 7.41E-07 | 9.81E-06 | NM_022483    |
| ANKRD5   | 38  | 102 | 11.27 | 29.75  | 1.400402 | 7.02E-08 | 1.11E-06 | NM_198798    |
| NR1D1    | 68  | 182 | 20.16 | 53.09  | 1.396945 | 5.86E-13 | 2.12E-11 | NM_021724    |
| SH2D5    | 37  | 99  | 10.97 | 28.88  | 1.396507 | 1.18E-07 | 1.78E-06 | NM_001103161 |
| TRIM14   | 52  | 137 | 15.42 | 39.96  | 1.373754 | 7.13E-10 | 1.49E-08 | NM_014788    |
| FGF2     | 30  | 78  | 8.9   | 22.75  | 1.353989 | 4.45E-06 | 5.02E-05 | NM_002006    |
| ARTN     | 47  | 122 | 13.94 | 35.59  | 1.352241 | 9.23E-09 | 1.66E-07 | NM_057091    |
| OGFR     | 54  | 140 | 16.01 | 40.84  | 1.35101  | 7.73E-10 | 1.62E-08 | NM_007346    |
| ZBTB22   | 27  | 70  | 8.01  | 20.42  | 1.350109 | 1.46E-05 | 0.000146 | NM_001145338 |
| UBE2L6   | 175 | 451 | 51.89 | 131.55 | 1.342083 | 4.03E-   | 1.53E-   | NM_198183    |

|          |     |      |        |        |          |          |          |              |
|----------|-----|------|--------|--------|----------|----------|----------|--------------|
|          |     |      |        |        |          | 13       | 11       |              |
| PSMB5    | 143 | 366  | 42.4   | 106.76 | 1.332235 | 0        | 0        | NM_001130725 |
| INPP5K   | 54  | 138  | 16.01  | 40.25  | 1.330015 | 1.60E-09 | 3.22E-08 | NM_016532    |
| SERF2    | 80  | 204  | 23.72  | 59.5   | 1.326786 | 1.80E-13 | 7.26E-12 | NM_001018108 |
| MTERFD1  | 40  | 102  | 11.86  | 29.75  | 1.326786 | 2.32E-07 | 3.38E-06 | NM_015942    |
| KIFC3    | 38  | 96   | 11.27  | 28     | 1.312939 | 6.46E-07 | 8.65E-06 | NM_005550    |
| COTL1    | 682 | 1435 | 202.23 | 418.57 | 1.049472 | 1.48E-12 | 4.75E-11 | NM_021149    |
| HAUS6    | 39  | 82   | 11.56  | 23.92  | 1.049076 | 0.000122 | 0.000965 | NM_017645    |
| FADS3    | 59  | 124  | 17.49  | 36.17  | 1.048263 | 2.23E-06 | 2.70E-05 | NM_021727    |
| PAQR3    | 90  | 18   | 26.69  | 5.25   | -2.34591 | 3.47E-13 | 1.33E-11 | NM_001040202 |
| NFATC2IP | 140 | 28   | 41.51  | 8.17   | -2.34505 | 9.58E-20 | 6.56E-18 | NM_032815    |
| TMEM180  | 70  | 23   | 20.76  | 6.71   | -1.62942 | 4.84E-07 | 6.64E-06 | NM_024789    |
| FABP5    | 628 | 207  | 186.22 | 60.38  | -1.62487 | 1.00E-51 | 1.61E-49 | NM_001444    |
| SLBP     | 443 | 147  | 131.36 | 42.88  | -1.61515 | 1.11E-36 | 1.32E-34 | NM_006527    |
| C5orf62  | 42  | 14   | 12.45  | 4.08   | -1.6095  | 0.00012  | 0.000954 | NM_032947    |
| SLC04A1  | 42  | 14   | 12.45  | 4.08   | -1.6095  | 0.00012  | 0.000953 | NM_016354    |
| SRPR     | 96  | 32   | 28.47  | 9.33   | -1.60949 | 4.92E-09 | 9.24E-08 | NM_001177842 |
| AMH      | 93  | 31   | 27.58  | 9.04   | -1.60923 | 8.57E-09 | 1.55E-07 | NM_000479    |
| DICER1   | 72  | 24   | 21.35  | 7      | -1.60881 | 4.24E-07 | 5.93E-06 | NM_030621    |
| DPY30    | 144 | 48   | 42.7   | 14     | -1.60881 | 7.18E-13 | 2.54E-11 | NM_032574    |
| MRPS2    | 126 | 42   | 37.36  | 12.25  | -1.60871 | 1.95E-11 | 5.02E-10 | NM_016034    |
| FIS1     | 582 | 194  | 172.58 | 56.59  | -1.60865 | 2.13E-47 | 3.31E-45 | NM_016068    |
| SUN2     | 54  | 18   | 16.01  | 5.25   | -1.60858 | 1.24E-05 | 0.000126 | NM_001199579 |
| ZNF544   | 69  | 23   | 20.46  | 6.71   | -1.60842 | 7.41E-07 | 9.82E-06 | NM_014480    |
| SDSL     | 53  | 19   | 15.72  | 5.54   | -1.50464 | 3.76E-   | 0.0003   | NM_138432    |

|          |      |     |        |        |          |          |          |              |
|----------|------|-----|--------|--------|----------|----------|----------|--------------|
|          |      |     |        |        |          | 05       | 34       |              |
| ADAM19   | 153  | 55  | 45.37  | 16.04  | -1.50006 | 2.10E-12 | 6.48E-11 | NM_033274    |
| PGLS     | 111  | 40  | 32.91  | 11.67  | -1.49572 | 2.39E-09 | 4.69E-08 | NM_012088    |
| LMNB1    | 158  | 57  | 46.85  | 16.63  | -1.49426 | 1.05E-12 | 3.50E-11 | NM_001198557 |
| HR       | 80   | 29  | 23.72  | 8.46   | -1.48737 | 4.70E-07 | 6.48E-06 | NM_018411    |
| IFT80    | 55   | 20  | 16.31  | 5.83   | -1.48419 | 3.22E-05 | 0.000295 | NM_001190241 |
| SKI      | 55   | 20  | 16.31  | 5.83   | -1.48419 | 3.22E-05 | 0.000295 | NM_003036    |
| BCL9     | 55   | 20  | 16.31  | 5.83   | -1.48419 | 3.22E-05 | 0.000294 | NM_004326    |
| AAMP     | 355  | 129 | 105.27 | 37.63  | -1.48414 | 1.94E-26 | 1.70E-24 | NM_001087    |
| SLC37A3  | 118  | 43  | 34.99  | 12.54  | -1.48041 | 1.02E-09 | 2.10E-08 | NM_207113    |
| PSENFEN  | 74   | 27  | 21.94  | 7.88   | -1.4773  | 1.43E-06 | 1.79E-05 | NM_172341    |
| RANGRF   | 74   | 27  | 21.94  | 7.88   | -1.4773  | 1.43E-06 | 1.79E-05 | NM_001177801 |
| CCND3    | 63   | 23  | 18.68  | 6.71   | -1.47711 | 8.93E-06 | 9.41E-05 | NM_001760    |
| RPS9     | 1340 | 492 | 397.34 | 143.51 | -1.46922 | 1.04E-93 | 2.35E-91 | NM_001013    |
| SMAD1    | 49   | 18  | 14.53  | 5.25   | -1.46865 | 9.95E-05 | 0.00081  | NM_001003688 |
| C9orf167 | 149  | 55  | 44.18  | 16.04  | -1.46172 | 1.03E-11 | 2.73E-10 | NM_017723    |
| MED6     | 233  | 86  | 69.09  | 25.09  | -1.46136 | 1.64E-17 | 9.70E-16 | NM_005466    |
| HDGFRP2  | 233  | 86  | 69.09  | 25.09  | -1.46136 | 1.64E-17 | 9.65E-16 | NM_032631    |
| TRMT5    | 138  | 51  | 40.92  | 14.88  | -1.45943 | 6.16E-11 | 1.49E-09 | NM_020810    |
| WDHD1    | 73   | 27  | 21.65  | 7.88   | -1.4581  | 2.13E-06 | 2.59E-05 | NM_007086    |
| CS       | 627  | 232 | 185.92 | 67.67  | -1.45809 | 2.67E-44 | 3.81E-42 | NM_004077    |
| SH3PXD2A | 54   | 20  | 16.01  | 5.83   | -1.45741 | 4.82E-05 | 0.00042  | NM_014631    |
| NUP93    | 224  | 83  | 66.42  | 24.21  | -1.45601 | 8.37E-17 | 4.72E-15 | NM_014669    |
| MAP3K11  | 70   | 26  | 20.76  | 7.58   | -1.45354 | 3.73E-06 | 4.28E-05 | NM_002419    |
| HSD11B2  | 51   | 19  | 15.12  | 5.54   | -1.4485  | 8.47E-   | 0.0007   | NM_000196    |

|         |      |      |        |        |          |             |             |              |
|---------|------|------|--------|--------|----------|-------------|-------------|--------------|
|         |      |      |        |        |          | 05          | 03          |              |
| SF3B2   | 778  | 290  | 230.7  | 84.59  | -1.44746 | 5.58E-54    | 9.21E-52    | NM_006842    |
| PHGDH   | 126  | 47   | 37.36  | 13.71  | -1.44627 | 5.50E-10    | 1.18E-08    | NM_006623    |
| C1QBP   | 2898 | 1082 | 859.33 | 315.6  | -1.44512 | #####<br>## | #####<br>## | NM_001212    |
| FBL     | 632  | 236  | 187.4  | 68.84  | -1.4448  | 4.65E-44    | 6.58E-42    | NM_001436    |
| ZNF507  | 192  | 72   | 56.93  | 21     | -1.4388  | 2.22E-14    | 1.10E-12    | NM_001136156 |
| IRGQ    | 56   | 21   | 16.61  | 6.13   | -1.43809 | 4.10E-05    | 0.000362    | NM_001007561 |
| HSBP1L1 | 72   | 27   | 21.35  | 7.88   | -1.43797 | 3.18E-06    | 3.71E-05    | NM_001136180 |
| KCTD9   | 213  | 80   | 63.16  | 23.33  | -1.43682 | 9.27E-16    | 4.99E-14    | NM_017634    |
| WWP2    | 85   | 32   | 25.2   | 9.33   | -1.43347 | 4.37E-07    | 6.08E-06    | NM_007014    |
| KIF22   | 170  | 64   | 50.41  | 18.67  | -1.43299 | 7.90E-13    | 2.76E-11    | NM_007317    |
| SKA1    | 69   | 26   | 20.46  | 7.58   | -1.43254 | 5.54E-06    | 6.16E-05    | NM_001039535 |
| CSRP1   | 154  | 58   | 45.66  | 16.92  | -1.4322  | 9.52E-12    | 2.56E-10    | NM_001193571 |
| PSMG3   | 218  | 83   | 64.64  | 24.21  | -1.41682 | 8.53E-16    | 4.61E-14    | NM_032302    |
| ANAPC13 | 186  | 71   | 55.15  | 20.71  | -1.41303 | 1.22E-13    | 5.15E-12    | NM_001242375 |
| PRIM2   | 94   | 36   | 27.87  | 10.5   | -1.40832 | 1.55E-07    | 2.31E-06    | NM_000947    |
| ZFP36L2 | 99   | 38   | 29.36  | 11.08  | -1.40589 | 7.63E-08    | 1.20E-06    | NM_006887    |
| HIF1A   | 168  | 65   | 49.82  | 18.96  | -1.39377 | 3.13E-12    | 9.16E-11    | NM_181054    |
| AFMID   | 459  | 178  | 136.1  | 51.92  | -1.3903  | 1.03E-30    | 1.03E-28    | NM_001145526 |
| SAT1    | 1405 | 545  | 416.62 | 158.97 | -1.38998 | 1.94E-90    | 4.30E-88    | NR_027783    |
| MAP7D1  | 157  | 61   | 46.55  | 17.79  | -1.38771 | 1.87E-11    | 4.83E-10    | NM_018067    |
| KDM2B   | 108  | 42   | 32.02  | 12.25  | -1.38619 | 2.71E-08    | 4.62E-07    | NM_032590    |
| RAB21   | 72   | 28   | 21.35  | 8.17   | -1.38583 | 5.89E-06    | 6.52E-05    | NM_014999    |



| Probe ID | Name            | Normalized Intensity |            | Fold change |
|----------|-----------------|----------------------|------------|-------------|
|          |                 | FoxO3 knockdown      | Control    |             |
| 17888    | hsa-let-7a-3p   | 5.248694699          | 13.581526  | 0.386458392 |
| 147165   | hsa-let-7b-5p   | 1.393728401          | 5.134844   | 0.271425656 |
| 42668    | hsa-let-7c-3p   | 1.072371173          | 2.858405   | 0.375164182 |
| 145820   | hsa-let-7c-5p   | 0.020371135          | 3.890275   | 0.005236425 |
| 145968   | hsa-let-7d-5p   | 0.248673531          | 3.4373431  | 0.072344693 |
| 145846   | hsa-let-7e-5p   | 2.193184425          | 2.8843405  | 0.760376393 |
| 145840   | hsa-let-7f-1-3p | 2.361203602          | 5.6085796  | 0.420998501 |
| 148250   | hsa-let-7f-2-3p | 1.879232278          | 5.6085796  | 0.335063851 |
| 17752    | hsa-let-7f-5p   | 4.288340709          | 5.6085796  | 0.764603699 |
| 42778    | hsa-let-7g-3p   | 1.330147081          | 2.5085323  | 0.530249134 |
| 46438    | hsa-let-7g-5p   | 0.023544986          | 4.3534894  | 0.005408302 |
| 10916    | hsa-miR-1       | 11.12521259          | 5.3931494  | 2.062841536 |
| 145694   | hsa-miR-100-3p  | 0.817996488          | 3.6611314  | 0.223427241 |
| 145943   | hsa-miR-100-5p  | 1.613821116          | 4.459224   | 0.361906268 |
| 31026    | hsa-miR-101-3p  | 0.259402541          | 2.5085323  | 0.103408093 |
| 17935    | hsa-miR-101-5p  | 0.769554235          | 4.2524843  | 0.180965803 |
| 42562    | hsa-miR-105-3p  | 1.739766765          | 4.2524843  | 0.40911774  |
| 5250     | hsa-miR-105-5p  | 0.907855451          | 2.5085323  | 0.361907021 |
| 42508    | hsa-miR-106a-3p | 1.327608029          | 3.8210106  | 0.347449449 |
| 46801    | hsa-miR-106a-5p | 13.70071534          | 5.378524   | 2.547300215 |
| 17854    | hsa-miR-106b-3p | 3.715316457          | 8.177286   | 0.454345911 |
| 19582    | hsa-miR-106b-5p | 3.676286236          | 8.177286   | 0.449572907 |
| 10923    | hsa-miR-107     | 0.848934714          | 2.5085323  | 0.338418889 |
| 28019    | hsa-miR-10a-3p  | 2.415358215          | 5.702542   | 0.423558163 |
| 13485    | hsa-miR-10a-5p  | 1.782637322          | 5.844227   | 0.305025339 |
| 42969    | hsa-miR-10b-3p  | 1.041773406          | 2.5085323  | 0.415292004 |
| 10925    | hsa-miR-10b-5p  | 1.000310935          | 2.5085323  | 0.398763426 |
| 46822    | hsa-miR-1178-3p | 1.140026622          | 2.5085323  | 0.454459614 |
| 46735    | hsa-miR-1179    | 0.958943354          | 5.0050015  | 0.191597016 |
| 168601   | hsa-miR-146b-3p | 6.794175411          | 3.3126929  | 2.050952387 |
| 10306    | hsa-miR-146b-5p | 1.213726619          | 2.876522   | 0.421942408 |
| 146121   | hsa-miR-1470    | 1.346539456          | 2.876522   | 0.468113735 |
| 146052   | hsa-miR-1471    | 2.577381617          | 5.9797707  | 0.431016798 |
| 10954    | hsa-miR-147a    | 1.366458257          | 3.4255304  | 0.39890414  |
| 168968   | hsa-miR-147b    | 33.17614835          | 13.3389435 | 2.487164621 |
| 42736    | hsa-miR-148b-5p | 0.484398995          | 2.8999696  | 0.167035887 |
| 169087   | hsa-miR-149-3p  | 1.911348731          | 4.5270305  | 0.422208053 |
| 42810    | hsa-miR-149-5p  | 0.963919291          | 2.8540592  | 0.337736264 |
| 42850    | hsa-miR-150-3p  | 1.051361099          | 2.8540592  | 0.368373963 |
| 145678   | hsa-miR-150-5p  | 0.734199567          | 4.5405283  | 0.16169915  |
| 17463    | hsa-miR-151a-3p | 0.848354551          | 3.386517   | 0.250509462 |
| 11260    | hsa-miR-151a-5p | 0.876525343          | 2.791005   | 0.314053663 |
| 42902    | hsa-miR-185-5p  | 10.35286601          | 4.7865305  | 2.162916544 |

|        |                  |             |           |             |
|--------|------------------|-------------|-----------|-------------|
| 148057 | hsa-miR-186-3p   | 3.292113573 | 9.802156  | 0.335856068 |
| 10990  | hsa-miR-196a-5p  | 4.352965599 | 10.639929 | 0.409116038 |
| 145995 | hsa-miR-196b-3p  | 0.519426136 | 2.5085323 | 0.207063763 |
| 145889 | hsa-miR-196b-5p  | 2.054920861 | 6.290021  | 0.32669539  |
| 146142 | hsa-miR-1972     | 28.07307428 | 13.345192 | 2.103609621 |
| 146165 | hsa-miR-1973     | 5.669616516 | 13.345192 | 0.424843383 |
| 42783  | hsa-miR-197-3p   | 2.897952919 | 13.345192 | 0.217153333 |
| 169017 | hsa-miR-197-5p   | 6.146849476 | 13.345192 | 0.460604049 |
| 146140 | hsa-miR-1976     | 1.78702914  | 5.4082212 | 0.330428264 |
| 148637 | hsa-miR-198      | 0.221204173 | 3.8729517 | 0.057115139 |
| 10995  | hsa-miR-199a-3p  | 0.862674446 | 7.548056  | 0.114290944 |
| 29562  | hsa-miR-199a-5p  | 0.682629717 | 7.548056  | 0.090437818 |
| 19591  | hsa-miR-199b-5p  | 3.482948465 | 7.548056  | 0.46143649  |
| 10997  | hsa-miR-19a-3p   | 1.365983566 | 7.548056  | 0.180971573 |
| 42549  | hsa-miR-19a-5p   | 15.20423292 | 7.548056  | 2.01432434  |
| 17883  | hsa-miR-19b-1-5p | 2.273699454 | 5.2354283 | 0.434291012 |
| 42918  | hsa-miR-19b-2-5p | 28.10511019 | 5.2354283 | 5.368254244 |
| 10998  | hsa-miR-19b-3p   | 1.906669204 | 5.2354283 | 0.364185907 |
| 168819 | hsa-miR-200a-3p  | 2.06463473  | 5.2354283 | 0.394358324 |
| 145827 | hsa-miR-200a-5p  | 2.431601032 | 5.096446  | 0.477117001 |
| 147186 | hsa-miR-200b-3p  | 1.129297435 | 2.5085323 | 0.450182537 |
| 145974 | hsa-miR-200b-5p  | 5.333329547 | 8.063998  | 0.661375356 |
| 17427  | hsa-miR-200c-3p  | 2.317557737 | 8.063998  | 0.287395624 |
| 17851  | hsa-miR-200c-5p  | 4.749087539 | 8.063998  | 0.588924692 |
| 148685 | hsa-miR-202-3p   | 6.468290683 | 2.5085323 | 2.578516004 |
| 42507  | hsa-miR-202-5p   | 1.90307472  | 6.1345997 | 0.31021987  |
| 146116 | hsa-miR-2116-3p  | 5.214689456 | 6.1345997 | 0.850045596 |
| 148386 | hsa-miR-219b-5p  | 6.321536651 | 6.1345997 | 1.030472559 |
| 11022  | hsa-miR-221-3p   | 21.09298263 | 6.1345997 | 3.438363326 |
| 42475  | hsa-miR-221-5p   | 1.670674709 | 4.2147202 | 0.39639042  |
| 11023  | hsa-miR-222-3p   | 0.932984905 | 3.6949162 | 0.252505024 |
| 17918  | hsa-miR-222-5p   | 1.519754102 | 4.4571605 | 0.340969122 |
| 11024  | hsa-miR-223-3p   | 1.742115061 | 4.4571605 | 0.390857601 |
| 42460  | hsa-miR-223-5p   | 1.414167157 | 3.3971329 | 0.416282553 |
| 11020  | hsa-miR-22-3p    | 1.462069057 | 4.868551  | 0.300308872 |
| 146163 | hsa-miR-224-3p   | 0.742826153 | 2.5085323 | 0.296119828 |
| 168772 | hsa-miR-224-5p   | 1.824051998 | 3.7477036 | 0.486711916 |
| 42532  | hsa-miR-22-5p    | 1.012059584 | 3.7285514 | 0.271435063 |
| 145638 | hsa-miR-29a-5p   | 3.878036612 | 3.7285514 | 1.040092035 |
| 17810  | hsa-miR-29b-1-5p | 1.343340412 | 3.4296086 | 0.391689131 |
| 42792  | hsa-miR-29b-2-5p | 0.771106149 | 3.6692657 | 0.210152715 |
| 11040  | hsa-miR-29b-3p   | 1.360680879 | 6.104528  | 0.222896984 |
| 11041  | hsa-miR-29c-3p   | 0.940086404 | 4.0280128 | 0.233387144 |
| 14300  | hsa-miR-29c-5p   | 1.135246322 | 3.5151527 | 0.322957896 |
| 169419 | hsa-miR-300      | 1.469291467 | 4.4623127 | 0.32926681  |
| 13143  | hsa-miR-301a-3p  | 2.368768409 | 5.5179453 | 0.429284504 |
| 28191  | hsa-miR-30e-5p   | 0.911368565 | 2.5085323 | 0.363307486 |

|        |                 |             |           |             |
|--------|-----------------|-------------|-----------|-------------|
| 11063  | hsa-miR-330-3p  | 1.251415184 | 2.5085323 | 0.498863493 |
| 145843 | hsa-miR-330-5p  | 1.095851079 | 3.6788268 | 0.297880585 |
| 42887  | hsa-miR-331-3p  | 0.829848288 | 2.5085323 | 0.330810286 |
| 17866  | hsa-miR-331-5p  | 1.187468467 | 3.5432253 | 0.335137725 |
| 145745 | hsa-miR-335-3p  | 1.133132143 | 4.5223107 | 0.250564859 |
| 11065  | hsa-miR-335-5p  | 0.970971481 | 4.1359015 | 0.234766587 |
| 42673  | hsa-miR-337-3p  | 12.99466245 | 3.9894013 | 3.257296389 |
| 17944  | hsa-miR-337-5p  | 1.056655462 | 3.0183666 | 0.350075256 |
| 42592  | hsa-miR-338-3p  | 1.463007906 | 4.179124  | 0.350075256 |
| 17825  | hsa-miR-338-5p  | 6.447832461 | 4.179124  | 1.542866989 |
| 42912  | hsa-miR-339-3p  | 1.23376837  | 4.179124  | 0.295221767 |
| 42739  | hsa-miR-339-5p  | 1.233771791 | 4.179124  | 0.295222585 |
| 42934  | hsa-miR-345-5p  | 1.176331406 | 4.179124  | 0.281477986 |
| 145732 | hsa-miR-346     | 0.283442611 | 4.179124  | 0.067823451 |
| 148595 | hsa-miR-34a-3p  | 11.79783773 | 4.179124  | 2.82304084  |
| 168586 | hsa-miR-34a-5p  | 1.973892698 | 4.179124  | 0.472322118 |
| 148640 | hsa-miR-34b-3p  | 1.66158554  | 4.179124  | 0.397591825 |
| 11073  | hsa-miR-34b-5p  | 0.390991094 | 4.5012717 | 0.086862362 |
| 148601 | hsa-miR-3617-5p | 0.605258573 | 2.5085323 | 0.24127996  |
| 168786 | hsa-miR-3618    | 0.441689828 | 2.5085323 | 0.176075001 |
| 168665 | hsa-miR-3619-3p | 7.258465788 | 3.2472324 | 2.235277582 |
| 42476  | hsa-miR-374b-3p | 5.229298825 | 2.5085323 | 2.08460494  |
| 148098 | hsa-miR-374b-5p | 0.796518908 | 2.5085323 | 0.31752388  |
| 148052 | hsa-miR-374c-3p | 0.94552828  | 2.5085323 | 0.376924898 |
| 148430 | hsa-miR-374c-5p | 3.110432823 | 10.157288 | 0.306226704 |
| 46918  | hsa-miR-375     | 0.293298686 | 2.5085323 | 0.116920434 |
| 146009 | hsa-miR-376a-3p | 0.925247678 | 2.5085323 | 0.368840249 |
| 42885  | hsa-miR-376a-5p | 0.247608632 | 2.5085323 | 0.098706575 |
| 169406 | hsa-miR-376b-3p | 0.123738685 | 2.5085323 | 0.049327125 |
| 168947 | hsa-miR-3975    | 1.493316343 | 5.5119386 | 0.27092398  |
| 169316 | hsa-miR-3976    | 1.698024784 | 6.724288  | 0.252521127 |
| 169069 | hsa-miR-3977    | 5.879126724 | 3.4803019 | 1.689257683 |
| 168894 | hsa-miR-3978    | 0.653788751 | 3.4803019 | 0.187854034 |
| 11240  | hsa-miR-409-3p  | 0.779736437 | 3.4803019 | 0.224042758 |
| 42925  | hsa-miR-409-5p  | 11.87583837 | 3.4803019 | 3.412301206 |
| 11102  | hsa-miR-410-3p  | 0.920275168 | 4.803857  | 0.191570059 |
| 148187 | hsa-miR-410-5p  | 10.32630886 | 4.690214  | 2.201671152 |
| 148559 | hsa-miR-411-3p  | 1.413859744 | 3.5666237 | 0.39641405  |
| 17482  | hsa-miR-411-5p  | 0.046902341 | 6.107152  | 0.007679904 |
| 42764  | hsa-miR-412-3p  | 0.680847933 | 2.5085323 | 0.271412863 |
| 147957 | hsa-miR-412-5p  | 5.160491628 | 2.5085323 | 2.057175675 |
| 148192 | hsa-miR-421     | 0.510592593 | 2.5085323 | 0.203542363 |
| 168676 | hsa-miR-499b-5p | 0.504339635 | 2.5085323 | 0.201049688 |
| 42669  | hsa-miR-505-3p  | 0.907779941 | 2.5085323 | 0.361876919 |
| 42490  | hsa-miR-505-5p  | 11.81271031 | 3.5095258 | 3.365899265 |
| 11138  | hsa-miR-506-3p  | 0.022228902 | 2.5085323 | 0.008861318 |
| 168704 | hsa-miR-506-5p  | 0.640881493 | 2.5085323 | 0.255480662 |

|        |                 |             |            |             |
|--------|-----------------|-------------|------------|-------------|
| 11139  | hsa-miR-507     | 0.5342903   | 3.0139923  | 0.177269962 |
| 11140  | hsa-miR-508-3p  | 0.961321906 | 2.5085323  | 0.38322086  |
| 42812  | hsa-miR-508-5p  | 0.732937294 | 2.7002382  | 0.27143431  |
| 168629 | hsa-miR-5087    | 0.68611717  | 4.63487    | 0.148033746 |
| 11149  | hsa-miR-515-5p  | 1.819235632 | 4.607603   | 0.394833416 |
| 145717 | hsa-miR-516a-3p | 1.92407284  | 4.607603   | 0.417586507 |
| 148650 | hsa-miR-516a-5p | 1.184796609 | 4.607603   | 0.257139473 |
| 11151  | hsa-miR-516b-5p | 1.904126619 | 4.607603   | 0.413257526 |
| 13130  | hsa-miR-517-5p  | 1.235208355 | 4.607603   | 0.268080465 |
| 145999 | hsa-miR-517a-3p | 0.743521594 | 3.6730704  | 0.202425087 |
| 11154  | hsa-miR-517c-3p | 0.634430815 | 4.3409047  | 0.146151749 |
| 169090 | hsa-miR-5186    | 0.941455414 | 7.456826   | 0.126254175 |
| 169185 | hsa-miR-5187-3p | 1.365039476 | 3.7719111  | 0.361895983 |
| 168897 | hsa-miR-5187-5p | 1.080582738 | 4.0262494  | 0.268384452 |
| 168632 | hsa-miR-5188    | 0.030848411 | 4.0167704  | 0.007679904 |
| 169218 | hsa-miR-5189-5p | 1.100538645 | 3.6202512  | 0.303995105 |
| 11155  | hsa-miR-518a-3p | 0.02736889  | 3.0885801  | 0.008861318 |
| 145905 | hsa-miR-518a-5p | 0.605065672 | 3.503089   | 0.172723466 |
| 148641 | hsa-miR-518b    | 1.541039287 | 3.503089   | 0.439908688 |
| 169387 | hsa-miR-5703    | 10.43976001 | 3.503089   | 2.980158371 |
| 17814  | hsa-miR-570-3p  | 0.018832044 | 3.105969   | 0.006063178 |
| 169211 | hsa-miR-5704    | 0.713010268 | 3.4364495  | 0.207484576 |
| 169196 | hsa-miR-5705    | 2.461947194 | 6.478985   | 0.379989642 |
| 168579 | hsa-miR-5706    | 3.215057925 | 7.0612164  | 0.455312193 |
| 169000 | hsa-miR-5707    | 0.013390929 | 3.0837464  | 0.004342422 |
| 169084 | hsa-miR-5708    | 10.84532244 | 3.7565415  | 2.887049813 |
| 17490  | hsa-miR-571     | 0.01760916  | 3.7565415  | 0.004687599 |
| 42837  | hsa-miR-577     | 0.942228224 | 2.8926654  | 0.325730112 |
| 17302  | hsa-miR-578     | 1.007697249 | 3.141336   | 0.320786203 |
| 42622  | hsa-miR-579-3p  | 2.248586256 | 4.619998   | 0.486707193 |
| 17459  | hsa-miR-580-3p  | 1.78109964  | 4.619998   | 0.385519569 |
| 14962  | hsa-miR-581     | 1.666910017 | 4.619998   | 0.36080319  |
| 42478  | hsa-miR-593-5p  | 1.854016508 | 5.7979307  | 0.319772106 |
| 17349  | hsa-miR-595     | 3.697829153 | 11.4941635 | 0.321713638 |
| 145833 | hsa-miR-596     | 0.947374348 | 2.5085323  | 0.377660813 |
| 42818  | hsa-miR-597-5p  | 76.52367703 | 6.264686   | 12.21508581 |
| 145648 | hsa-miR-598-3p  | 0.209396251 | 2.5085323  | 0.083473611 |
| 30592  | hsa-miR-599     | 2.165499681 | 4.5589733  | 0.474997228 |
| 17377  | hsa-miR-600     | 1.220465549 | 5.0209403  | 0.243075097 |
| 148677 | hsa-miR-637     | 0.872634479 | 5.091284   | 0.171397722 |
| 42832  | hsa-miR-638     | 0.117604143 | 5.091284   | 0.023099113 |
| 145962 | hsa-miR-639     | 5.567497877 | 6.3862724  | 0.871791481 |
| 169225 | hsa-miR-640     | 5.97620013  | 3.6286883  | 1.646931242 |
| 17530  | hsa-miR-641     | 3.006085731 | 8.998323   | 0.334071774 |
| 169059 | hsa-miR-642a-3p | 1.0767897   | 2.5085323  | 0.429250881 |
| 29190  | hsa-miR-708-5p  | 2.002963792 | 4.72044    | 0.424317181 |
| 146196 | hsa-miR-711     | 1.234934491 | 2.5085323  | 0.492293638 |

|        |                  |             |           |             |
|--------|------------------|-------------|-----------|-------------|
| 11277  | hsa-miR-7-1-3p   | 0.483855347 | 7.134042  | 0.067823451 |
| 146064 | hsa-miR-718      | 1.915029402 | 5.1071153 | 0.374972815 |
| 42964  | hsa-miR-7-2-3p   | 1.082144018 | 2.5085323 | 0.431385324 |
| 42970  | hsa-miR-744-3p   | 1.089178856 | 3.3438077 | 0.325730112 |
| 27568  | hsa-miR-744-5p   | 0.599019412 | 4.505517  | 0.132952425 |
| 32891  | hsa-miR-769-5p   | 1.430235445 | 4.505517  | 0.317440916 |
| 28251  | hsa-miR-770-5p   | 0.790750083 | 4.732048  | 0.167105254 |
| 30442  | hsa-miR-802      | 2.938606066 | 2.5085323 | 1.171444381 |
| 168991 | hsa-miR-873-3p   | 1.273850302 | 4.479733  | 0.284358533 |
| 42493  | hsa-miR-892b     | 1.975939463 | 4.479733  | 0.441084204 |
| 42932  | hsa-miR-920      | 2.102019055 | 4.479733  | 0.469228647 |
| 46507  | hsa-miR-921      | 5.322350729 | 13.147345 | 0.404823235 |
| 42683  | hsa-miR-922      | 2.066019622 | 7.611733  | 0.271425656 |
| 42788  | hsa-miR-924      | 1.179508265 | 4.4784594 | 0.263373665 |
| 42926  | hsa-miR-92a-1-5p | 1.581071406 | 6.048903  | 0.261381511 |
| 42801  | hsa-miR-92a-2-5p | 1.268635355 | 4.4190598 | 0.28708264  |
| 145693 | hsa-miR-92a-3p   | 1.117943956 | 3.755281  | 0.297699148 |
| 145897 | hsa-miR-92b-3p   | 5.441760598 | 3.755281  | 1.449095447 |
| 146115 | hsa-miR-940      | 2.461332221 | 6.9323063 | 0.355052433 |
| 148625 | hsa-miR-941      | 2.22926235  | 5.226414  | 0.426537651 |
| 11182  | hsa-miR-98-5p    | 1.366904374 | 4.280859  | 0.319306096 |
| 42708  | hsa-miR-99a-5p   | 1.327971622 | 4.280859  | 0.310211484 |
| 11184  | hsa-miR-99b-5p   | 2.023897628 | 4.280859  | 0.47277839  |

266  
267  
268  
269  
270  
271  
272  
273  
274  
275  
276  
277  
278  
279  
280  
281  
282

**Supplemental Table 3. RNA Sequencing Data**

| Gene_ID         | readcount_shGem+shFoxO3 | readcount_Con+Con | log2.Fold_change. | pvalue   | qvalue     | Associated Gene Name |
|-----------------|-------------------------|-------------------|-------------------|----------|------------|----------------------|
| ENSG00000054654 | 67.4078                 | 136.1346          | -1.014            | 1.94E-06 | 0.00025608 | SYNE2                |
| ENSG00000066279 | 79.74898                | 176.9055          | -1.1494           | 1.71E-09 | 6.22E-07   | ASPM                 |
| ENSG00000075539 | 69.98539                | 142.7329          | -1.0282           | 8.18E-07 | 0.00012131 | FRYL                 |
| ENSG00000080345 | 46.709                  | 110.783           | -1.246            | 3.61E-07 | 6.15E-05   | RIF1                 |
| ENSG00000100697 | 66.70483                | 138.8434          | -1.0576           | 6.36E-07 | 9.96E-05   | DICER1               |
| ENSG00000100852 | 145.2822                | 294.2868          | -1.0184           | 2.16E-12 | 1.74E-09   | ARHGAP5              |
| ENSG00000102189 | 33.58674                | 85.08411          | -1.341            | 2.28E-06 | 0.00028869 | EEA1                 |
| ENSG00000117724 | 161.0601                | 375.0647          | -1.2195           | 3.46E-20 | 7.41E-17   | CENPF                |
| ENSG00000118193 | 40.77274                | 89.73769          | -1.1381           | 2.09E-05 | 0.0017516  | KIF14                |
| ENSG00000118482 | 72.48487                | 171.2795          | -1.2406           | 2.87E-10 | 1.35E-07   | PHF3                 |
| ENSG00000125676 | 50.22389                | 118.9094          | -1.2434           | 1.42E-07 | 2.84E-05   | THOC2                |
| ENSG00000131747 | 374.375                 | 788.886           | -1.0753           | 2.21E-33 | 1.06E-29   | TOP2A                |
| ENSG00000134318 | 66.00185                | 154.7489          | -1.2294           | 2.69E-09 | 8.78E-07   | ROCK2                |
| ENSG00000135837 | 44.8344                 | 111.616           | -1.3159           | 9.59E-08 | 2.03E-05   | CEP350               |
| ENSG00000137831 | 90.29365                | 196.0755          | -1.1187           | 5.60E-10 | 2.37E-07   | UACA                 |
| ENSG00000137962 | 261.6641                | 541.6906          | -1.0498           | 1.42E-22 | 5.47E-19   | ARHGAP29             |
| ENSG00000138246 | 40.3822                 | 89.18204          | -1.143            | 2.07E-05 | 0.0017516  | DNAJC13              |
| ENSG00000138688 | 56.47259                | 117.937           | -1.0624           | 4.08E-06 | 0.00045476 | KIAA1109             |
| ENSG00000139793 | 41.2414                 | 87.8624           | -1.0912           | 4.78E-05 | 0.0034798  | MBNL2                |
| ENSG00000145725 | 34.9927                 | 80.43053          | -1.2007           | 2.57E-05 | 0.0020494  | PPIP5K2              |
| ENSG00000148516 | 33.5086                 | 77.305            | -1.206            | 3.47E-05 | 0.0026498  | ZEB1                 |
| ENSG00000164023 | 43.74087                | 95.57203          | -1.1276           | 1.31E-05 | 0.0012353  | SGMS2                |
| ENSG00000164327 | 35.22702                | 82.2364           | -1.2231           | 1.57E-05 | 0.0014094  | RICTOR               |
| ENSG00000173230 | 45.14683                | 96.12768          | -1.0903           | 2.13E-05 | 0.0017648  | GOLGB1               |
| ENSG00000134853 | 58.26909                | 121.2709          | -1.0574           | 3.26E-06 | 0.00036774 | PDGFRA               |
| ENSG00000189057 | 24.2918                 | 61.95512          | -1.3508           | 4.98E-05 | 0.0035974  | FAM111B              |
| ENSG00000198677 | 39.36678                | 93.97453          | -1.2553           | 2.42E-06 | 0.00030292 | TTC37                |
| ENSG00000159111 | 9.008495                | 34.02252          | -1.9171           | 3.88E-05 | 0.0012804  | MRPL10               |
| ENSG00000128708 | 29.5172                 | 69.78293          | -1.2413           | 1.12E-05 | 0.00042804 | HAT1                 |

284

285

286

287

288

289

290

291

292

293

294

295  
296  
297**Supplemental Table 4. Primers for quantitative real time PCR**

| <b>Name</b>     | <b>Sequence(5'→3')</b>        |
|-----------------|-------------------------------|
| Dicer-ChIP-F1   | AGGAACACAAAGGGCATATCTTG       |
| Dicer-ChIP-R1   | TCACACCTGTCCCTAGTGTCACAAA     |
| Dicer-ChIP-F2   | GGGCGGAAGTGGGTGTTTGTAT        |
| Dicer-ChIP-R2   | ACCTTCCCCTCGCCTGCGTTTCC       |
| Dicer-ChIP-F3   | GCTAAGCTCTCCGGGAAACA          |
| Dicer-ChIP-F3   | TCCTTCTGGCACCCACAGA           |
| Dicer-ChIP-F4   | CCAACTCAAAGTGTCCCTATTAACA     |
| Dicer-ChIP-F4   | AGTGACAGGAAGTAGAATGGTGGTT     |
| Dicer-qRT-F     | CATGGATAGTGGGATGTCAC          |
| Dicer-qRT-R     | CTACTTCCACAGTGAAGTCTG         |
| mDicer-qRT-F    | CTTGAGGCTGCTTCGGTCT           |
| mDicer-qRT-R    | CAGGCCCCACGAGCAA              |
| Ago1-qRT-F      | GAGCCTATGTTCCGGCATCTC         |
| Ago1-qRT-R      | GAGTGTATCTCCGACACGTTTCAC      |
| Ago2-qRT-F      | CCAGCTACA CTCAGACCAACAGA      |
| Ago2-qRT-R      | GAAAACGGAGAATCTAATAAAATCA     |
| Drosha-qRT-F    | TAGGCTGTGGGAAAGGACCAAG        |
| Drosha-qRT-R    | GTTTCGATGAACCGCTTCTGATG       |
| PDGFRA-qRT-F    | GAGCATCTTTGACAACCTCTACAC      |
| PDGFRA-qRT-R    | CCGGTACCCACTCTTGATCTTATTG     |
| TBP-qRT-F       | GCACAGGAGCCAAGAGTGAA          |
| TBP-qRT-R       | TCACAGCTCCCCACCATATT          |
| HAT1-qRT-F      | CGAGACTTTGTGCTTGTGAAGCT       |
| HAT1-qRT-R      | CCATATCTTCATTGAATCCTTGCA      |
| KIAA1109-qRT-F  | AAAGATGGGTGCAATTCGAG          |
| KIAA1109-qRT-R  | TCCGTAGCACTGCAGGCT            |
| UACA-qRT-F      | GGCAGATTGTCCTTCTAGCATACA      |
| UACA-qRT-R      | GTGGTGTCCGCCCGTCTAC           |
| MRPL10-qRT-F    | CTGTCCGCTATGGCTCCAA           |
| MRPL10-qRT-R    | TCTGCCGCTGAAAGTGCAT           |
| KIAA1109-ChIP-F | GGTTGTTAGGGTAGCAAAGTGATTTT    |
| KIAA1109-ChIP-R | CGCCCTGTTTCCCTCCTCTCT         |
| UACA-ChIP-F     | CAGACGGAAGGGAAGGAACTT         |
| UACA-ChIP-R     | GCCTTTGCCACCTCTCATCTT         |
| PDGFRA -ChIP-F  | TTGAGCCCATTACTGTTGGA          |
| PDGFRA -ChIP-R  | ACGGCCTCCAATGATCTCTT          |
| HAT -ChIP-F     | GGGAAAGCAGTTCCTACAGCTACT      |
| HAT-ChIP-R      | TCTTGCATGCCACATGTCCTA         |
| MRPL10-ChIP-F   | CCTTACCCCGCTGTTTTCC           |
| MRPL10-ChIP-R   | TATTTTAGATCATGTCTGGAGGTGAGTAG |
